# Supplementary material
Source: publisher site journal article supplement (http://bdj.pensoft.net//lib/ajax_srv/article_elements_srv.php?action=download_suppl_file&instance_id=3347999)
Supplement: Supplementary file 1 [file article_elements_srv.php]

## Sheet: APIs
BIODIVERSITY INFORMATION PORTAL APIS
Portal name	API Endpoint	Documentation URL	Data format
GBIF	http://api.gbif.org/v1/occurrence/search	http://www.gbif.org/developer/summary	Darwin-core compatible
BOLD Systems	http://www.boldsystems.org/index.php/API_Public/specimen	http://boldsystems.org/index.php/resources/api	In-house format
iDigBio	https://search.idigbio.org/v2/view/records	https://www.idigbio.org/wiki/index.php/IDigBio_API	Darwin-core compatible
PlutoF	https://api.plutof.ut.ee//v1/public/taxonoccurrence/specimen/specimens/	https://chaos.ut.ee/wiki/doku.php?id=api:specimen	In-house format

## Sheet: Mappings
MAPPINGS FROM DARWIN CORE TO INHOUSE FORMATS AT DIFFERENT PORTALS
DwC	BOLD Systems	PlutoF	Example
typeStatus	voucher_type	identification_typification	Other material
catalogNumber	catalognum	specimen_id	BC ZSM HYM 01932
occurrenceDetails			http://www.boldsystems.org/index.php/Public_RecordView?processid=FBAPB457-09
occurrenceRemarks		remarks
recordNumber	fieldnum
recordedBy	collectors	gathering_agents	C. Schmid-Egger
individualID	sampleid
individualCount			1
sex	sex	sex	M
lifeStage	lifestage	life_stage	A
reproductiveCondition	reproduction		S
behavior
establishmentMeans
occurrenceStatus
preparations		preparation_names
disposition
otherCatalogNumbers		additional_identifier_codes
previousIdentifications		previous_identifications
associatedMedia	image_urls	files	http://www.boldsystems.org/pics/FBAPB/BC_ZSM_HYM_01932.JPG+1254227340.JPG
associatedReferences
associatedOccurrences
associatedSequences
taxonID
scientificNameID
acceptedNameUsageID
parentNameUsageID
originalNameUsageID
nameAccordingToID
namePublishedInID
taxonConceptID
scientificName	species_name	taxon_name	Ammobates punctatus
acceptedNameUsage
parentNameUsage
originalNameUsage
nameAccordingTo
namePublishedIn
higherClassification
kingdom		kingdom
phylum	phylum_name	phylum	Arthropoda
class	class_name	taxon_class	Insecta
order	order_name	order	Hymenoptera
family	family_name	family	Apidae
genus	genus_name	genus	Ammobates
subgenus
specificEpithet
infraspecificEpithet
taxonRank
verbatimTaxonRank
scientificNameAuthorship
vernacularName
nomenclaturalCode
taxonomicStatus
nomenclaturalStatus
taxonRemarks
locationID
higherGeographyID
higherGeography
continent
waterBody
islandGroup
island
country	country	country	Germany
countryCode
stateProvince	province	state	Brandenburg
county	county	district
municipality
locality	exactsite	locality_text	Berlin, Zossen
verbatimLocality
verbatimElevation
minimumElevationInMeters
maximumElevationInMeters
verbatimDepth
minimumDepthInMeters
maximumDepthInMeters
minimumDistanceAboveSurfaceInMeters
maximumDistanceAboveSurfaceInMeters
locationAccordingTo
locationRemarks
verbatimCoordinates
verbatimLatitude
verbatimLongitude
verbatimCoordinateSystem
verbatimSRS
decimalLatitude	lat	latitude	52.12
decimalLongitude	lon	longitude	13.28
geodeticDatum
coordinateUncertaintyInMeters	coord_accuracy	coordinate_uncertainty_in_meters
coordinatePrecision
pointRadiusSpatialFit
footprintWKT
footprintSRS
footprintSpatialFit
georeferencedBy
georeferenceProtocol
georeferenceSources
georeferenceVerificationStatus
georeferenceRemarks
identificationID		identification_id
identifiedBy	identification_provided_by	identified_by	Christian Schmid-Egger
dateIdentified		date_identified
identificationReferences
identificationRemarks	notes	identification_remarks
identificationQualifier		identification_assessment
geologicalContextID
earliestEonOrLowestEonothem
latestEonOrHighestEonothem
earliestEraOrLowestErathem
latestEraOrHighestErathem
earliestPeriodOrLowestSystem
latestPeriodOrHighestSystem
earliestEpochOrLowestSeries
latestEpochOrHighestSeries
earliestAgeOrLowestStage
latestAgeOrHighestStage
lowestBiostratigraphicZone
highestBiostratigraphicZone
lithostratigraphicTerms
group
formation
member
bed
eventID
samplingProtocol
samplingEffort
eventDate	collectiondate	timespan_begin	2001-07-03
eventTime
startDayOfYear
endDayOfYear
year
month
day
verbatimEventDate
habitat
fieldNumber
fieldNotes
eventRemarks
type
modified
language
rights
rightsHolder
accessRights
bibliographicCitation
institutionID
collectionID
datasetID
institutionCode
collectionCode
datasetName
ownerInstitutionCode
basisOfRecord
informationWithheld
dataGeneralizations
dynamicProperties
source
institutionCode		institution_code
otherCatalogNumbers		additional_identifier_codes
